# Supplementary material for: Caught in the data quality trap: A case study from the evaluation of a new digital technology supporting routine health data collection in Southern Tanzania
Source: bioRxiv or medRxiv preprint supplement (doi:10.1101/2023.04.12.23288456), 2023-04-17

# REGISTRATION FORM

Health facility

DEMO

Date  day  month

01 1 02

Identification number

000-0092

Name:  Partner name:   
Age:  Height (cm):  Local government chairperson:   
Village:  Street or/Sub-village:  Phone number:

### Pregnancy history

Previous CS

Age of youngest child:

### Current pregnancy

Duration of pregnancy (weeks):

#### Number of:

Miscarriages/Abortions:

Newborn deaths (first week):

Live births:

Stillbirths:

Children alive:

Date of last menstrual period

day  month

Estimated date of delivery

day  month

Identification number

000-0101

Name:  Partner name:   
Age:  Height (cm):  Local government chairperson:   
Village:  Street or/Sub-village:  Phone number:

### Pregnancy history

Previous CS

Age of youngest child:

### Current pregnancy

Duration of pregnancy (weeks):

#### Number of:

Miscarriages/Abortions:

Newborn deaths (first week):

Live births:

Stillbirths:

Children alive:

Date of last menstrual period

day  month

Estimated date of delivery

day  month

01 1 02

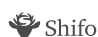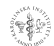

Karolinska Institutet

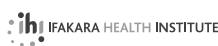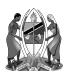



# REGISTRATION UPDATE FORM

Health facility DEMO

Date   <sup>day</sup> -   <sup>month</sup>

02 1 02

Identification number   -

Name:  Partner name

Age  Height (cm)  Local government chairperson

Village  Street or/Sub-village  Phone number

---

**Pregnancy history**

Previous CS  Age of youngest child

**Number of:**

Miscarriages/Abortions   Newborn deaths (first week)

Live births   Stillbirths   Children alive

**Current pregnancy**

Duration of pregnancy (weeks)

day month

Date of last menstrual period   -

Estimated date of delivery   -

Identification number   -

Name:  Partner name

Age  Height (cm)  Local government chairperson

Village  Street or/Sub-village  Phone number

---

**Pregnancy history**

Previous CS  Age of youngest child

**Number of:**

Miscarriages/Abortions   Newborn deaths (first week)

Live births   Stillbirths   Children alive

**Current pregnancy**

Duration of pregnancy (weeks)

day month

Date of last menstrual period   -

Estimated date of delivery   -

02 1 02

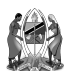



# ANTENATAL FORM

Health facility **DEMO**

Date  day -  month

03 1 02

Identification number  -

Visit number: 1  2  3  4  5+

Has TT card  TT1  TT2+

### Test results at current ANC visit

BP  /

Hb

Urinalysis: Sugar  Protein

Blood grouping and cross-match done

Syphilis: Woman: Positive  Negative  Treated   
Partner: Positive  Negative  Treated

Other STI: Woman: Positive  Treated   
Partner: Positive  Treated

### Repeated visits:

No weight gain  Vaginal bleeding  Bad posture for baby  TB

### PMTCT

Woman Partner

Previous HIV infection

Received counselling before testing

Tested for HIV at current ANC visit

Tested positive

Counselled after testing

Advice on infant feeding

Referred to CTC

### Malaria

mRDT/BS: Positive  Negative  LLIN  IPT: 1  2  3+

### Supplements provided:

Albendazole/Mebendazole

Iron  Folic acid  IFA  Number of capsules

Referral given  Facility referred from

Referred to

Reason for referral

Comments

03 1 02

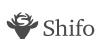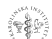

Karolinska Institutet

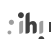

IFAKARA HEALTH INSTITUTE





# LABOUR FORM

Health facility

DEMO

Date  day -  month

04 1 02

Identification number

-

Name

day month time

Place of delivery

Mode of delivery

Admission:

-

Health facility

BBA

TBA

Home without TBA

Spontaneous

Vacuum

Other

Delivery:

-

Companion at birth

CS

Breech

Labour duration over 12 hours

Cadre of birth attendant

MO

AMO

CO/ACO

EN

RN

MA

Birth outcome:

Live birth

FSB

MSB

Multiple birth

For multiple births, fill in another labour form with mother's ID and information for other newborns

Sex of baby: Female

Male

Apgar score:

1 min

5 min

Breastfeeding within 1 hour

Care of the baby

No intervention

Stimulation

Bag and mask

Suction

Birth weight (g)

Labour complications

No complications

Sepsis

APH

Chest pain

PPH

Maternal exhaustion

3rd degree tear

Anemia

High blood pressure

Retained placenta

PROM

HIV (III or IV)

Malaria

Obstructed labour

Ruptured uterus

FGM

Before delivery

Pre-eclampsia

Eclampsia

AMTSL:

Oxytocine

Misoprostol

During/within 24h:

Pre-eclampsia

Eclampsia

Ergometrine

Controlled cord traction

Fundal pressure

EmOC:

No intervention

Blood transfusion

Anti-hypertensive drug

Hysterectomy

Uterotonics

Uterine balloon tamponade

MVA/D&C

Misoprostol

Antibiotics

iv-Magnesium

3rd/4th degree tear repair

CS/Laparotomy

Manual removal of placenta

PMTCT:

Previous HIV infection:

Positive

Negative

Unknown

HIV test result during/after delivery:

Positive

Negative

Unknown

Discharge information

Feeding

Supplements

Exclusive breastfeeding

day month

cause of death

Maternal death:

-

Newborn death:

-

Received ARV prophylaxis

Name of ARV

Referrals:

Mother

Referral for

ARV at CTC

Referred to

Referral reason

Health worker name

Signature

04 1 02

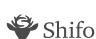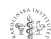

Karolinska Institutet

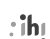

IFAKARA HEALTH INSTITUTE

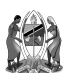

# LABOUR FORM

04 2 02

Identification number  -

Name

day month time

Admission:  -   Health facility  BBA  TBA  Home without TBA  Spontaneous  Vacuum  Other

Delivery:  -   Companion at birth  CS  Breech

Labour duration over 12 hours

**Place of delivery**

**Mode of delivery**

**Cadre of birth attendant** MO  AMO  CO/ACO  EN  RN  MA

**Birth outcome:** Live birth  FSB  MSB  Multiple birth  For multiple births, fill in another labour form with mother's ID and information for other newborns

**Sex of baby:** Female  Male  **Apgar score:** 1 min  5 min  Breastfeeding within 1 hour

**Care of the baby** No intervention  Stimulation  Bag and mask  Suction  Birth weight (g)

**Matatizo na Matokeo ya Uzazi**

No complications  Sepsis  APH  Chest pain  PPH  Maternal exhaustion

3rd degree tear  Anemia  High blood pressure  Retained placenta  PROM

HIV (III or IV)  Malaria  Obstructed labour  Ruptured uterus  FGM

**Before delivery:** Pre-eclampsia  Eclampsia  **AMTSL:** Oxytocine  Misoprostol

**During/within 24h:** Pre-eclampsia  Eclampsia  Ergometrine  Controlled cord traction  Fundal pressure

**EmOC:** No intervention  Blood transfusion  Anti-hypertensive drug  Hysterectomy  Uterotonics

Uterine balloon tamponade  MVA/D&C  Misoprostol  Antibiotics

iv-Magnesium  3rd/4th degree tear repair  CS/Laparotomy  Manual removal of placenta

**PMTCT:** Previous HIV infection: Positive  Negative  Unknown

HIV test result during/after delivery: Positive  Negative  Unknown

**Discharge information**

**Feeding** Supplements  Exclusive breastfeeding

Received ARV prophylaxis  Name of ARV

day month cause of death

Maternal death:  -

Newborn death:  -

**Referrals:** Mother  Baby  Referred for ARV at CTC  Referred to  Referral reason

Health worker name

Signature

04 2 02

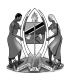



# POSTNATAL FORM

Health facility

DEMO

Date  day -  month

05 1 02

Identification number

-

Maternal death  Newborn death  BP (mmHg)  /  Hb (g/dl)

**HIV test at postnatal ward:**

Positive  Negative

Pre-eclampsia 24h after delivery

Eclampsia 24h after delivery

**Fistula:** Yes  No

**Mental status:** Normal  Abnormal

**Breasts**

Normal

Cracked nipples

Mastitis

Abscess

**Uterus**

Normal  Pain

Not well contracted

**Lochia**

Normal

Abnormal colour

**Perineum:**

Healed  Not healed

Infection

**Family planning services provided**

Counselling

FP method given

Information materials

Referral for FP method

**Supplements given**

Iron  Folic acid  IFA (Number of tablets)

Vitamin A (Number of tablets)

**Mtoto**

For multiple births, fill in another form with mother's ID and information for the baby

Temp (°C)

BCG  OPV  Vitamin K

Weight (g)

Hb (g/dl)

Pallor (palms)  KMC initiated

**Infections:**

No sign of infection  Umbilical cord  Skin  Oral  Eye  Jaundice  Sepsis

**PMTCT:**

HIV test result: Positive  Negative

ARV given  Name of ARV  Duration (weeks)

**Feeding:**

Exclusive  Replacement  Mixed

**Rufaa**

Referral from

Referral to

Reason

05 1 02

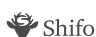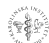

Karolinska Institutet

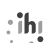

IFAKARA HEALTH INSTITUTE



# POSTNATAL FORM

05 2 02

Identification number

-

Maternal death  Newborn death  BP (mmHg)  /  Hb (g/dl)

**HIV test at postnatal ward:**

Positive  Negative

Pre-eclampsia 24h after delivery

Eclampsia 24h after delivery

**Fistula:** Yes  No

**Mental status:** Normal  Abnormal

**Breasts**

Normal

Cracked nipples

Mastitis

Abscess

**Uterus**

Normal  Pain

Not well contracted

**Lochia**

Normal

Abnormal colour

**Perineum:**

Healed  Not healed

Infection

**Family planning services provided**

Counselling

FP method given

Information materials

Referral for FP method

**Supplements given**

Iron  Folic acid  IFA

Vitamin A

Number of tablets

Number of tablets

**Mtoto**

For multiple births, fill in another form with mother's ID and information for the baby

Temp (°C)

BCG  OPV  Vitamin K

Weight (g)

Hb (g/dl)

Pallor (palms)  KMC initiated

**Infections:**

No sign of infection  Umbilical cord  Skin  Oral  Eye  Jaundice  Sepsis

**PMTCT:**

HIV test result: Positive  Negative

ARV given  Name of ARV  Duration (weeks)

**Feeding:**

Exclusive  Replacement  Mixed

**Rufaa**

Referral from

Referral to

Reason

Health worker name

Signature

05 2 02



Karolinska Institutet



IFAKARA HEALTH INSTITUTE



Supplement: Supplementary file [file media-3.pdf]
