# Supplementary material for: Caught in the data quality trap: A case study from the evaluation of a new digital technology supporting routine health data collection in Southern Tanzania
Source: bioRxiv or medRxiv preprint supplement (doi:10.1101/2023.04.12.23288456), 2023-04-17
Supplement: Supplementary file [file media-2.pdf]

**Figure S2 Indicator 5**

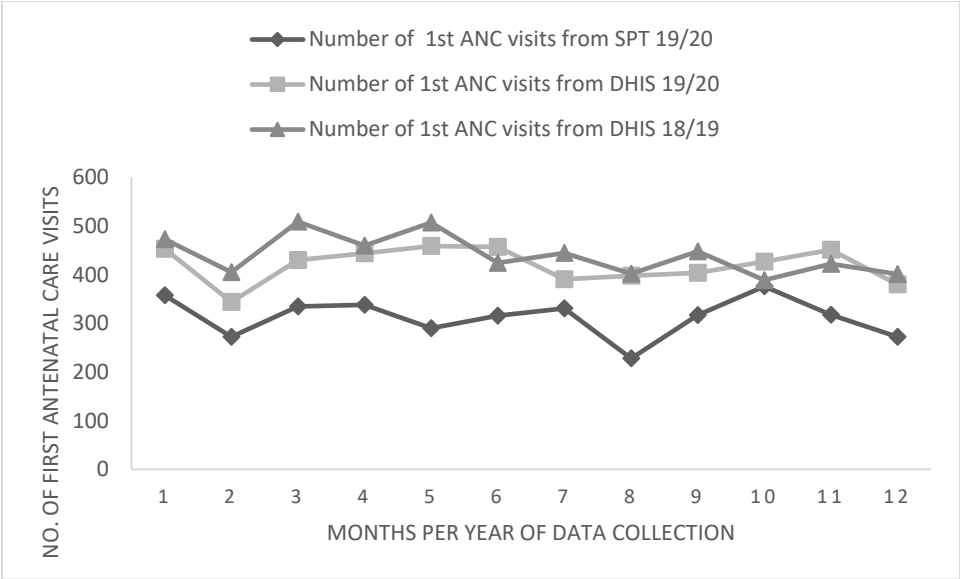

**Indicator 5a - Trends over time in client numbers for antenatal care 1st visit for SPT and DHIS 2**

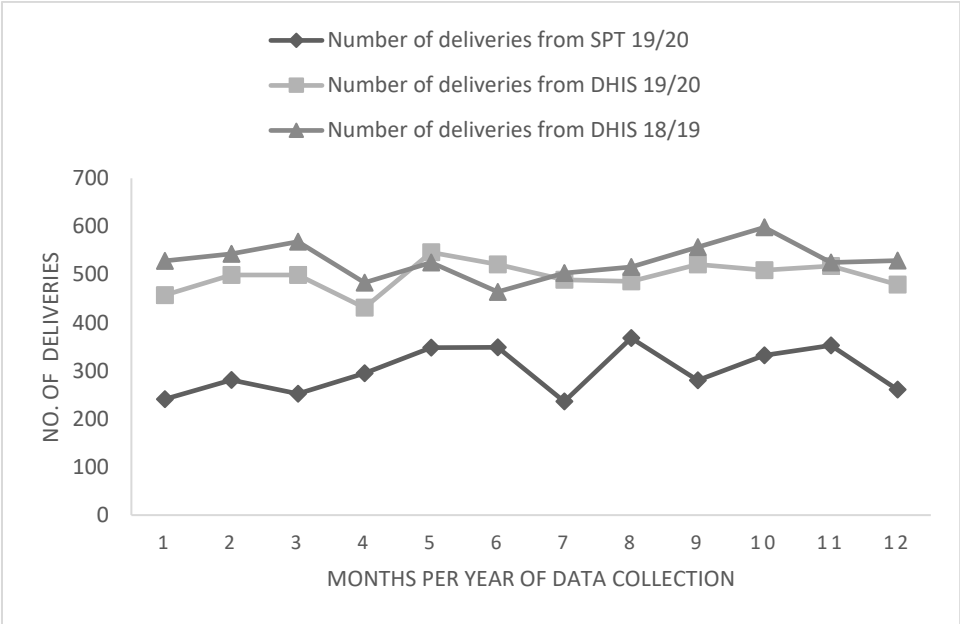

**Indicator 5b - Trends over time in number of deliveries for SPT and DHIS 2**

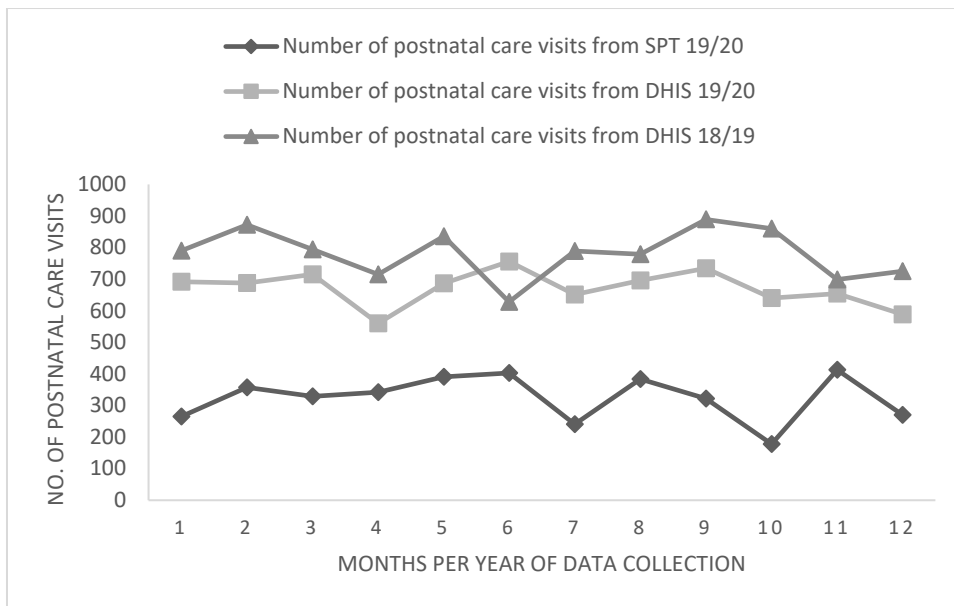

**Indicator 5c - Trends over time for number of postnatal care visits for SPT and DHIS 2**
