# Supplementary material for: Caught in the data quality trap: A case study from the evaluation of a new digital technology supporting routine health data collection in Southern Tanzania
Source: bioRxiv or medRxiv preprint supplement (doi:10.1101/2023.04.12.23288456), 2023-04-17
Supplement: Supplementary file [file media-4.pdf]

**Table S1: Glossary of terms**

|                                              |                                                                                                                                                                                                                                                                                                                                                                                        |
|----------------------------------------------|----------------------------------------------------------------------------------------------------------------------------------------------------------------------------------------------------------------------------------------------------------------------------------------------------------------------------------------------------------------------------------------|
| Health Information System (HIS)              | <i>An “integrated effort to collect, process, report and use health information and knowledge to influence policy-making, programme action and research”.</i>                                                                                                                                                                                                                          |
| Health Management Information System (HMIS)  | <i>“A system of service-generated data derived from facilities and patient–provider interactions covering aspects such as care offered, quality of care and treatments administered” as part of the HIS.</i>                                                                                                                                                                           |
| District Health Information System 2 (DHIS2) | The <b>web-based</b> software platform to collect, access and analyze data as the electronic part of HMIS in Tanzania.                                                                                                                                                                                                                                                                 |
| Facility registers                           | <b>Paper-based</b> registers as part of the HMIS for manual data collection on service provision for individual clients in all departments of a health facility including maternal health care. Individual data is summarized daily in paper-based tally sheets.                                                                                                                       |
| Facility summary reports                     | <b>Paper-based</b> forms as part of the HMIS to summarize monthly data on each client per department including maternal health care.                                                                                                                                                                                                                                                   |
| SPT forms                                    | <b>Paper-based</b> forms as part of SPT system for manual data collection on service provision for individual clients using a unique identifier. One form is completed for each client-provider encounter using the same identifier for an individual client. The <b>equivalent for HMIS</b> at facility level is the individual data entry in a row of the <b>facility register</b> . |
| Electronic SPT summary reports               | Electronic monthly summary of SPT data collected from each facility accessible on the SPT dashboard. The <b>equivalent for HMIS</b> is the electronic report for each facility in <b>DHIS2</b> .                                                                                                                                                                                       |
