# Supplementary material for: Caught in the data quality trap: A case study from the evaluation of a new digital technology supporting routine health data collection in Southern Tanzania
Source: bioRxiv or medRxiv preprint supplement (doi:10.1101/2023.04.12.23288456), 2023-04-17
Supplement: Supplementary file [file media-5.pdf]

**Table S2 Indicator 3: Reporting completeness for ANC 1<sup>st</sup> visit for DHIS2 and SPT by facility**

| Facility ID | DHIS2                                                                                    |           | SPT 2019/2020 |
|-------------|------------------------------------------------------------------------------------------|-----------|---------------|
|             | 2018/2019                                                                                | 2019/2020 |               |
|             | <i>Total number of months with non-missing reporting on ANC 1<sup>st</sup> visit (%)</i> |           |               |
| 1 HOSP      | 12 (100)                                                                                 | 12 (100)  | 12 (100)      |
| 2 HC        | 12 (100)                                                                                 | 12 (100)  | 12 (100)      |
| 3 HC        | 12 (100)                                                                                 | 12 (100)  | 12 (100)      |
| 4 D         | 12 (100)                                                                                 | 12 (100)  | 12 (100)      |
| 5 D         | 12 (100)                                                                                 | 11 (92)   | 11 (92)       |
| 6 D         | 12 (100)                                                                                 | 12 (100)  | 10 (83)       |
| 7 D         | 12 (100)                                                                                 | 12 (100)  | 12 (100)      |
| 8 D         | 12 (100)                                                                                 | 12 (100)  | 12 (100)      |
| 9 D         | 10 (83)                                                                                  | 11 (92)   | 10 (83)       |
| 10 D        | 11 (92)                                                                                  | 10 (83)   | 12 (100)      |
| 11 D        | 12 (100)                                                                                 | 11 (92)   | 6 (50)        |
| 12 D        | 11 (92)                                                                                  | 12 (100)  | 11 (92)       |
| 13 D        | 11 (92)                                                                                  | 12 (100)  | 12 (100)      |

*Legend: HOSP= Hospital, HC= Health Center, D= Dispensary, Grey= > 90%*
