# Supplementary material for: Caught in the data quality trap: A case study from the evaluation of a new digital technology supporting routine health data collection in Southern Tanzania
Source: bioRxiv or medRxiv preprint supplement (doi:10.1101/2023.04.12.23288456), 2023-04-17
Supplement: Supplementary file [file media-6.pdf]

**Table S3: Indicator 7- Difference between number of deliveries and women receiving oxytocin after birth of < +/- 10 % in DHIS2 and SPT by facility**

| Facility ID | DHIS2             |                |       |                   |                |       | SPT 2019/2020     |                |       |
|-------------|-------------------|----------------|-------|-------------------|----------------|-------|-------------------|----------------|-------|
|             | 2018/2019         |                |       | 2019/2020         |                |       | No. of deliveries | Oxytocin given | Ratio |
|             | No. of deliveries | Oxytocin given | Ratio | No. of deliveries | Oxytocin given | Ratio |                   |                |       |
| 1 HOSP      | 3,214             | 3,129          | 0.97  | 2,904             | 2,527          | 0.87  | 2,105             | 1,916          | 0.91  |
| 2 HC        | 613               | 550            | 0.90  | 608               | 593            | 0.98  | 375               | 338            | 0.90  |
| 3 HC        | 1,230             | 1,066          | 0.87  | 1,249             | 1,025          | 0.82  | 448               | 385            | 0.86  |
| 4 D         | 80                | 75             | 0.94  | 77                | 69             | 0.90  | 50                | 47             | 0.94  |
| 5 D         | 140               | 136            | 0.97  | 123               | 106            | 0.86  | 69                | 64             | 0.93  |
| 6 D         | 187               | 171            | 0.91  | 155               | 142            | 0.92  | 119               | 104            | 0.87  |
| 7 D         | 359               | 356            | 0.99  | 366               | 356            | 0.97  | 217               | 187            | 0.86  |
| 8 D         | 43                | 35             | 0.81  | 32                | 24             | 0.75  | 18                | 14             | 0.78  |
| 9 D         | 139               | 128            | 0.92  | 174               | 174            | 1.00  | 88                | 81             | 0.92  |
| 10 D        | 102               | 93             | 0.91  | 95                | 74             | 0.78  | 21                | 21             | 1.00  |
| 11 D        | 65                | 57             | 0.88  | 21                | 20             | 0.95  | 2                 | 2              | 1.00  |
| 12 D        | 52                | 42             | 0.81  | 36                | 32             | 0.89  | 16                | 16             | 1.00  |
| 13 D        | 115               | 88             | 0.77  | 115               | 91             | 0.79  | 68                | 62             | 0.91  |

Legend: HOSP= Hospital, HC= Health Center, D= Dispensary, Grey= Difference < +/- 0.10
